# Supplementary material for: Broad and ultra-potent cross-clade neutralization of HIV-1 by a vaccine-induced CD4 binding site bovine antibody
Source: PubMed Central journal article supplement — Cell Rep Med. 2022 May 17;3(5):100635. doi: 10.1016/j.xcrm.2022.100635 (PMC9133467; doi:10.1016/j.xcrm.2022.100635), 2022-05-17
Supplement: mmc1.pdf [file mmc1.pdf]

**Cell Reports Medicine, Volume 3**

**Supplemental information**

**Broad and ultra-potent cross-clade  
neutralization of HIV-1 by a vaccine-induced  
CD4 binding site bovine antibody**

**Behnaz Heydarchi, Danielle S. Fong, Hongmei Gao, Natalia A. Salazar-Quiroz, Jack M. Edwards, Christopher A. Gonelli, Samantha Grimley, Turgut E. Aktepe, Charlene Mackenzie, William J. Wales, Marit J. van Gils, Albert Cupo, Isabelle Rouiller, Paul R. Gooley, John P. Moore, Rogier W. Sanders, David Montefiori, Ashish Sethi, and Damian F.J. Purcell**

**Table S1: Primers used for producing chimeric bovine- human full antibodies. Related to STAR Methods (Single cell cDNA synthesis, RT-PCR and cloning)**

| Primer code | Sequence 5'-3'                             |                 | PCR Reaction |
|-------------|--------------------------------------------|-----------------|--------------|
| odp 2569    | ATGAACCCACTGTGGACCTC                       | Forward         | H1           |
| odp 2570    | AGAACTCAGAGGGTAGACTTTCGG                   | Reverse         | H1           |
| odp 3667    | CTTTCGGGGCTGTGGTGGAGGC                     | Reverse         | H1           |
| odp 3668    | <b>GAATTC</b> <u>MAGGTGCAGCTGCRGGAGTC</u>  | Forward (EcoRI) | H2           |
| odp 2568    | <b>GCTAGCT</b> <u>GAGGAGACGGTGACCAGGAG</u> | Reverse (NheI)  | H2           |
| odp 3670    | CACCATGGCCTGGTCCCCTCTG                     | Forward         | L1           |
| odp 3671    | GACCCAGACTCACCATCTC                        | Forward         | L1           |
| odp 3672    | AGGGCTGCGGGCTCAGAAGGCAGC                   | Forward         | L1           |
| odp 3673    | CTGCCCTCCTCACTCTCTGC                       | Forward         | L1           |
| odp 3674    | GGAACCTTTCCTGCAGCTC                        | Forward         | L1           |
| odp 3675    | GCTTGCTTATGGCTCAGGTC                       | Forward         | L1           |
| odp 2573    | ATGTCCACCATGGCCTGGTCC                      | Forward         | L1           |
| odp 2574    | CTTGTTGCCGTTGAGCTCCTC                      | Reverse         | L1           |
| odp 2571    | <b>GAATTC</b> <u>GCAGGCTGTGCTGACTCAG</u>   | Forward (EcoRI) | L2           |
| odp 3677    | <b>CCTAGG</b> <u>ACGACKGTCAGTGTGGTSCC</u>  | Reverse (AvrII) | L2           |
| odp 2781    | CTCAACTCTACGTCTTTGTTTC                     | Forward         | Sequencing   |

Restriction enzyme sites are in bold and the nucleotides inserted to keep the frame reading in

the expression vector are in *Italic and underlined*. H: heavy chain, L: light chain. Reaction

number shows whether the primer was used in nester RT-PCR reaction 1 or reaction 2.

**Table S2: Primers used for site directed mutagenesis of full length AD8 gp160 Env. Related to STAR Methods (Generation of HIV-1 AD8 pseudovirus mutant)**

| Primer code | Sequence 5'-3'                                                   |         | Mutation |
|-------------|------------------------------------------------------------------|---------|----------|
| odp 3770    | cacaagaagtagtattgg <b>C</b> aatgtgacaga                          | Forward | E87A     |
| odp 3771    | atthttctgtcacattt <b>G</b> ccaataactacttc                        | Reverse | E87A     |
| odp 3772    | taaagccatgtgta <b>G</b> Cattaacccactctgtg                        | Forward | K121A    |
| odp 3773    | acacagagtgggttaa <b>TG</b> Ctacacatggc                           | Reverse | K121A    |
| odp 3774    | aagactatgcactttttataga <b>G</b> Ctgatgtagtaccaatag               | Forward | L179A    |
| odp 3775    | tcattatctattggtagtactacatct <b>G</b> Ctctataaaaaagtgcatag        | Reverse | L179A    |
| odp 3776    | ttgatgtagtaccaatag <b>C</b> taatgataatactagctatagg               | Forward | D185A    |
| odp 3777    | acctatagctagtattatcatta <b>G</b> ctattggtagtaca                  | Reverse | D185A    |
| odp 3778    | tataggttgataaattg <b>G</b> Ctacctcaaccattacacagg                 | Forward | N197A    |
| odp 3779    | tgtgtaatgggtgaggta <b>G</b> Cacaatttatcaacctatagc                | Reverse | N197A    |
| odp 3782    | tcaactcaactgctgtta <b>G</b> Ctggcagcttagc                        | Forward | N262A    |
| odp 3783    | ttcttctgtagactgcca <b>G</b> Ctaacagcagttgag                      | Reverse | N262A    |
| odp 3784    | agaggtagtaattagatctagt <b>G</b> Ctttcacagacaatgc                 | Forward | N276A    |
| odp 3785    | ttgcattgtctgtgaaa <b>G</b> Cactagatctaattactacctc                | Reverse | N276A    |
| odp 3786    | tctagtaatttcacag <b>C</b> caatgcaaaaaacataatagtagc               | Forward | D279A    |
| odp 3787    | atgtttttgcatg <b>G</b> ctgtgaaattactagatctaattactac              | Reverse | D279A    |
| odp 3788    | atthtcacagacaatgca <b>G</b> Caaacataatagtagcagttg                | Forward | K282A    |
| odp 3789    | aactgtactattatgtt <b>TG</b> Ctgcattgtctgtgaaattac                | Reverse | K282A    |
| odp 3790    | ttcacagacaatgcaaaa <b>G</b> Ccataatagtagcagttg                   | Forward | N283A    |
| odp 3791    | ttcaactgtactattat <b>GG</b> Cttttgcatgctgtctgtg                  | Reverse | N283A    |
| odp 3792    | agtatacatatagga <b>G</b> caggaagagcattttatac                     | Forward | P313A    |
| odp 3793    | tgttgataaaaatgctcttctg <b>C</b> tctatagtagtatac                  | Reverse | P313A    |
| odp 3794    | aggagatataagacaaa <b>AA</b> acattgcaacattagtagaac                | Forward | A329K    |
| odp 3795    | ttgttctactaatgtt <b>TT</b> aatgtgctgtcttatatctcc                 | Reverse | A329K    |
| odp 3796    | aagacaagcacattgca <b>C</b> cattagtagaacaataatgg                  | Forward | N332T    |
| odp 3797    | tgttattccattttgttctactaatg <b>G</b> tgcaatgtgctgtcttatatc        | Reverse | N332T    |
| odp 3800    | aataaaacaatagtagctttaa <b>G</b> Catcctcaggaggggaccc              | Forward | Q363A    |
| odp 3801    | acaatttctgggtcccctcctgaggat <b>G</b> Cattaaagactattgtttattattccc | Reverse | Q363A    |
| odp 3802    | aacaatagctttaaataca <b>G</b> cctcaggaggggaccagaaattg             | Forward | S364A    |
| odp 3803    | ttctgggtcccctcctgagg <b>C</b> ttgattaaagactattgtttattattcc       | Reverse | S364A    |
| odp 3804    | aatagctttaaatacaatcc <b>G</b> caggaggggaccagaaattgtaatgc         | Forward | S365A    |
| odp 3805    | aatttctgggtcccctcctg <b>C</b> ggattgattaaagactattgtttattattcc    | Reverse | S365A    |
| odp 3806    | tagtctttaaatacaatcctcag <b>C</b> aggggaccagaaattgtaatgc          | Forward | G366A    |
| odp 3807    | attacaatttctgggtcccct <b>G</b> ctgaggattgattaaagac               | Reverse | G366A    |
| odp 3808    | tagtctttaaatacaatcctcaggag <b>C</b> ggaccagaaattgtaatgc          | Forward | G367A    |
| odp 3809    | tgcatataatctgggtcc <b>G</b> ctcctgaggattgattaaagac               | Reverse | G367A    |
| odp 3810    | ttaaatacaatcctcaggagggg <b>C</b> ccagaaattgtaatgcac              | Forward | D368A    |
| odp 3811    | aactgtgcattacaatttctggg <b>G</b> cccctcctgaggattg                | Reverse | D368A    |

**Table S2: Continued.**

| <b>Primer code</b> | <b>Sequence 5'-3'</b>                                       |         | <b>Mutation</b> |
|--------------------|-------------------------------------------------------------|---------|-----------------|
| odp 3812           | aatcaatcctcaggaggggac <b>G</b> cagaaattgtaatgcacag          | Forward | P369A           |
| odp 3813           | aactgtgcattacaatttctg <b>C</b> gtcccctcctgagg               | Reverse | P369A           |
| odp 3814           | aatcaatcctcaggaggggaccag <b>C</b> aattgtaatgcacag           | Forward | E370A           |
| odp 3815           | taaaactgtgcattacaatt <b>G</b> ctgggtcccctcctgagg            | Reverse | E370A           |
| odp 3816           | aatcctcaggaggggaccagaa <b>G</b> Ctghtaatgcacagtttaattgtgg   | Forward | I371A           |
| odp 3817           | aattaaactgtgcattaca <b>G</b> Cttctgggtcccctcc               | Reverse | I371A           |
| odp 3818           | atcaatcctcaggaggggaccagaaattg <b>C</b> aatgcacagtttaattgtgg | Forward | V372A           |
| odp 3819           | ttcccctccacaattaaactgtgcatt <b>G</b> caatttctgggtcccctcc    | Reverse | V372A           |
| odp 3820           | accagaaattgta <b>G</b> Cgcacagtttaattgtggaggg               | Forward | M373A           |
| odp 3821           | ttcccctccacaattaaactgtgc <b>G</b> Ctacaatttctggg            | Reverse | M373A           |
| odp 3822           | atgacctatcacactcccatgt <b>G</b> Caataaaacaaattataaacatgtg   | Forward | R419A           |
| odp 3823           | atgtttataatttgttttatt <b>G</b> Cacatgggagtgatagtgtc         | Reverse | R419A           |
| odp 3824           | atattacagggtgatatta <b>G</b> caagagatggtgaaataacc           | Forward | T455A           |
| odp 3825           | ttgtggttatttccaccatctcttg <b>C</b> taatatcagccctg           | Reverse | T455A           |
| odp 3826           | tacagggtgatattaacaagag <b>C</b> tgggtgaaataaccacaataatgatac | Forward | D457A           |
| odp 3827           | ttgtggttatttccacca <b>G</b> ctcttghtaatatcagccctg           | Reverse | D457A           |
| odp 3828           | taccgagaccttagacctg <b>C</b> aggaggagatagagggac             | Forward | G471A           |
| odp 3829           | ttgtccctcatatctcctcct <b>G</b> cagggtctaaaggctcgg           | Reverse | G471A           |
| odp 3830           | agaccttagacctggag <b>C</b> aggagatagagggacaattgg            | Forward | G472A           |
| odp 3831           | attgtccctcatatctcct <b>G</b> ctccagggtctaaaggctcgg          | Reverse | G472A           |
| odp 3832           | accttagacctggaggag <b>C</b> agatagagggacaattggag            | Forward | G473A           |
| odp 3833           | ttctccaattgtccctcatatct <b>G</b> ctcctcagggtctaaaggctcgg    | Reverse | G473A           |
| odp 3834           | tagacctggaggaggag <b>C</b> tatgagggacaattggagaagtg          | Forward | D474A           |
| odp 3835           | ttctccaattgtccctcata <b>G</b> ctcctcctcagggtctaaagg         | Reverse | D474A           |
| odp 3836           | ttagacctggaggaggagat <b>G</b> Cgagggacaattggagaagtg         | Forward | M475A           |
| odp 3837           | ttctccaattgtccctc <b>G</b> Catctcctcctcagggtctaaagg         | Reverse | M475A           |
| odp 3838           | tggaggaggagatag <b>G</b> Cggacaattggagaagtg                 | Forward | R476A           |
| odp 3839           | acttctccaattgtcc <b>G</b> Ccatatctcctcctcagggtctaaagg       | Reverse | R476A           |
| odp 1377           | ggtacataatgtttggccac                                        | Forward | Sequencing      |
| odp 1379           | gctgttaaatggcagtctagc                                       | Forward | Sequencing      |
| odp 1441           | ctactgtaattcaacacaactg                                      | Forward | Sequencing      |

Nucleotides to be mutated are shown in capital letters and bold font.

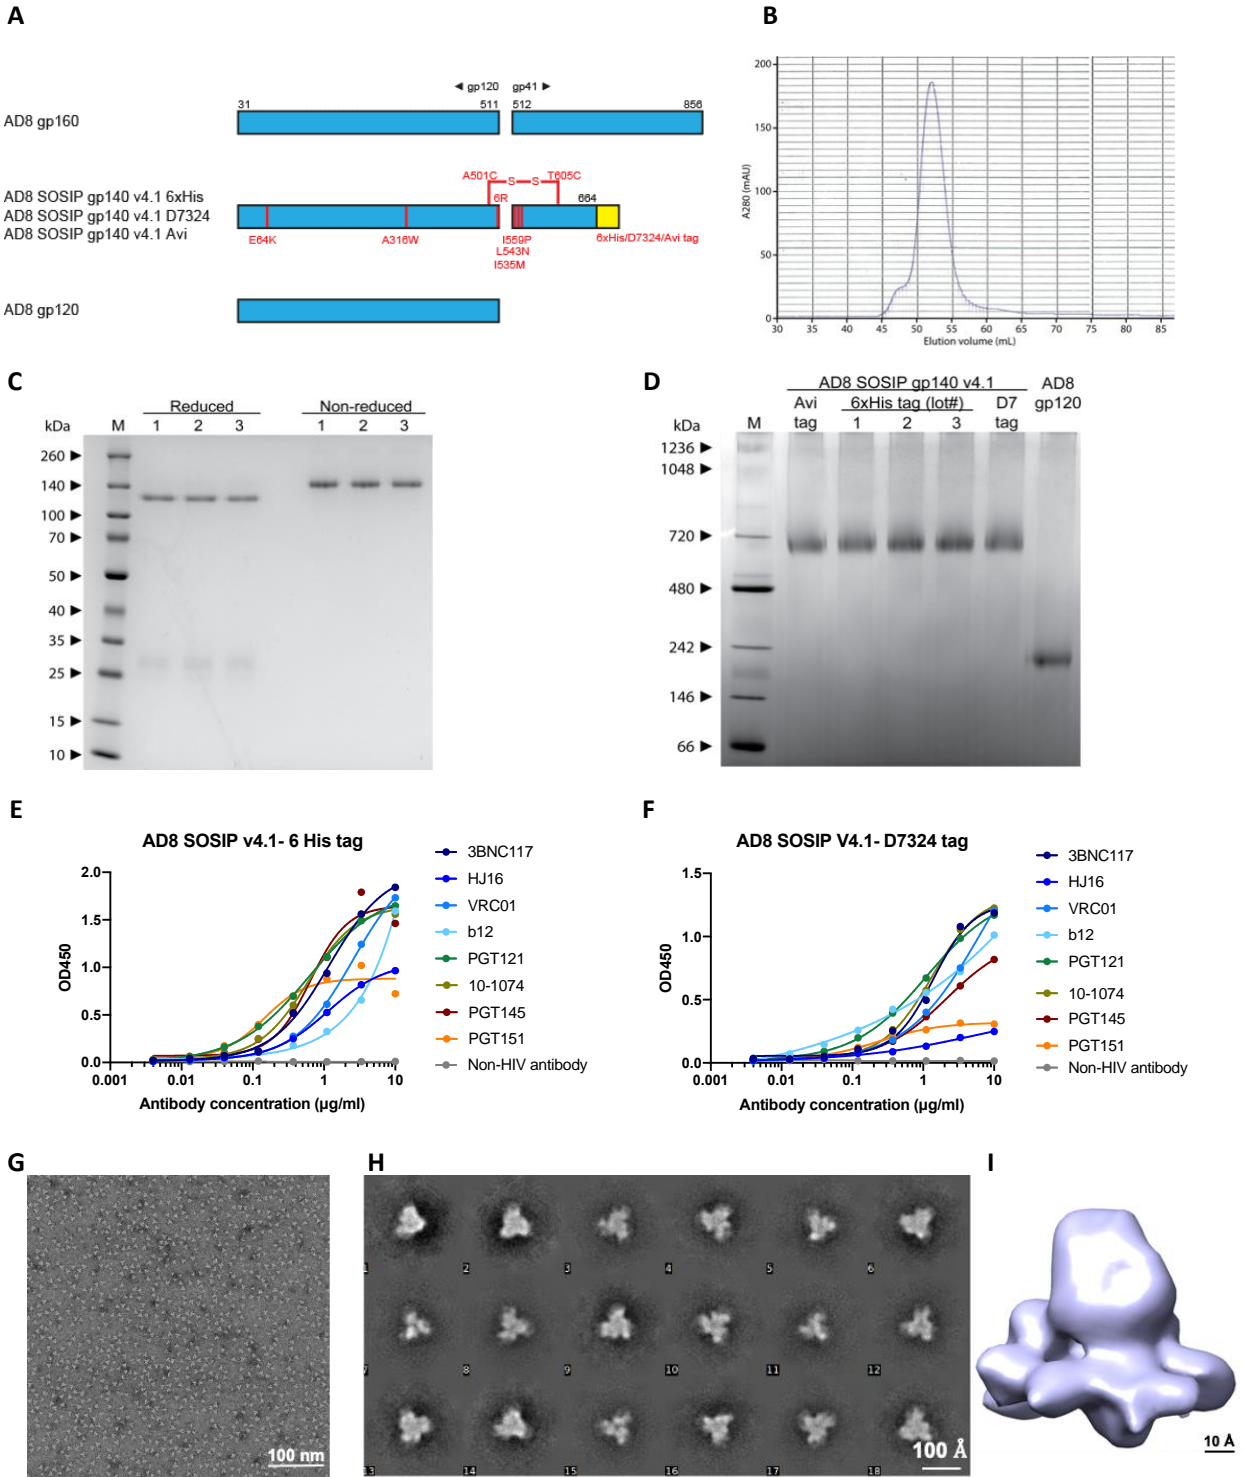

**Figure S1: Design and characterization of AD8 SOSIP trimers.** (A) Linear representation of mature AD8 gp160, SOSIP gp140 v4.1 (with either a 6xHis, D7324, or Avi tag at the C-terminus at position 664), and gp120. All Envs were expressed with their wild-type signal peptide. SOSIP v4.1 mutations were introduced as previously described [ref v4.1 paper SW de Taeye 2015 Cell]. (B) SEC profile of 2G12-purified AD8 SOSIP gp140 v4.1 6xHis run on a Superdex S200 16/600 column.

(C) SDS-PAGE analysis using an 8-16% Tris-glycine gel of 3 separate lots (numbered 1-3) of 2G12/SEC purified 6xHis-tagged AD8 SOSIP gp140 v4.1. Proteins were running with or without reducing agent. Lane M was loaded with Spectra Multicolor Broad Range Protein Ladder. (D) BN-PAGE analysis using a 4-16% Bis-Tris NativePAGE gel. Trimeric AD8 SOSIP gp140 v4.1 with Avi, 6xHis (3 separate lots), or a D7324 tag were analysed as well as monomeric AD8 gp120. Lane M was loaded with NativeMark Unstained Protein Standard. For both (C) and (D), gels were stained with Coomassie Blue. Capture ELISA on AD8 SOSIP v4.1 His tag (E) and D7324 tag (F) using human bNAbs. G) Negative staining using 1% Uranyl Acetate on freshly glow discharged carbon coated copper grids. Images were taken on FEI Talos L120C microscope. Pixel size: 1.9Å 73000X magnification. (H) 2D classes showing different views and (I) 3D volume map for AD8-SOSIP. Related to Figure 2.

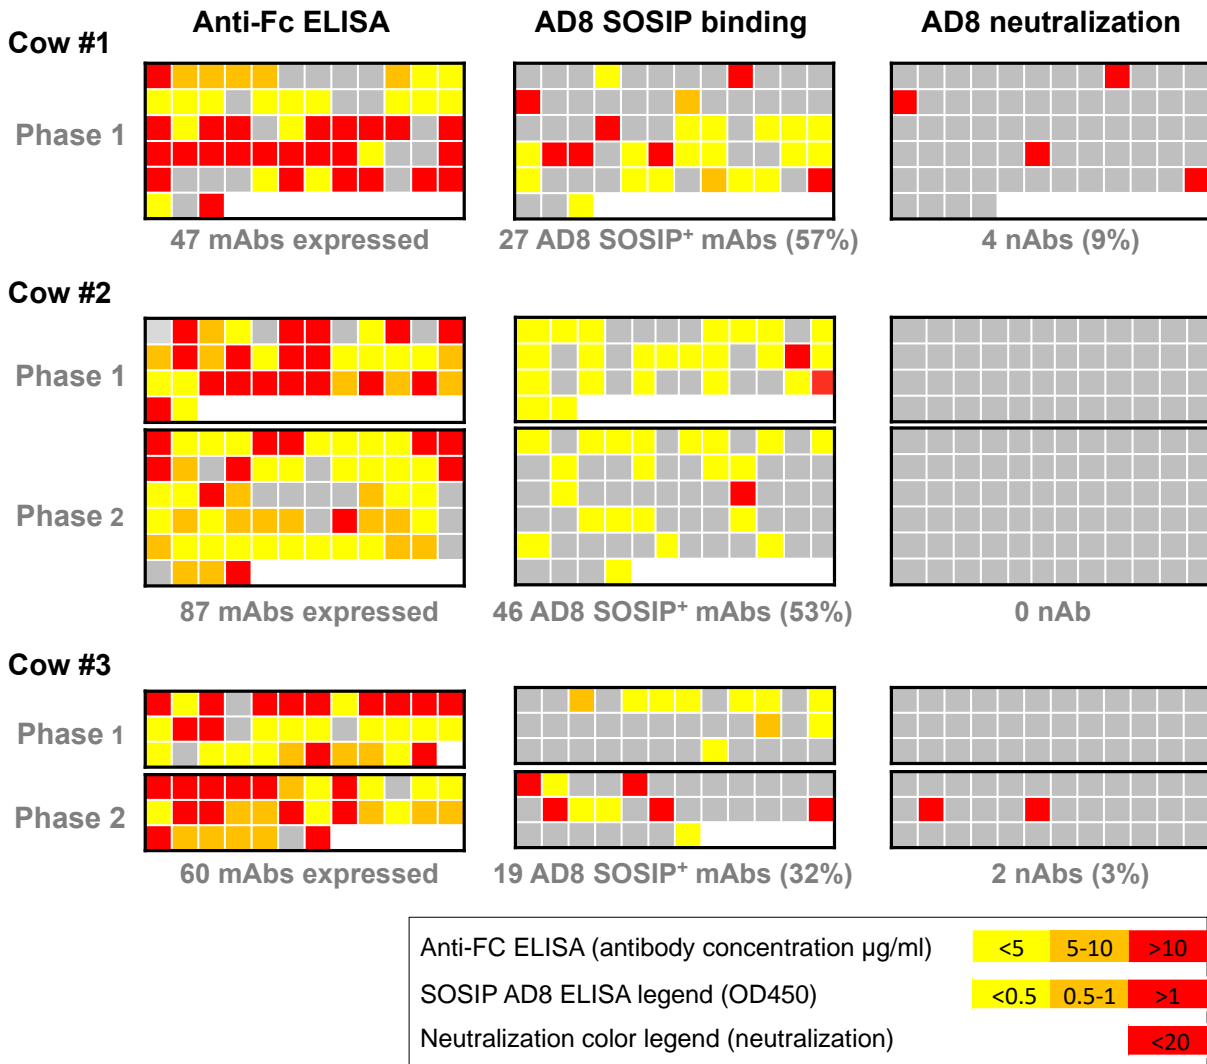

**Figure S2. Workflow of isolating anti-HIV bovine antibodies.** Amplified heavy chains were their light chain or with MEL-2129 antibody light chain and tested for expression (anti-Fc ELISA), antigen binding was assessed in capture ELISA using AD8 SOSIP gp140 v4.1 and autologous neutralization (AD8 pseudovirus) was investigated using TZM-bl cells. Related to Figure 2.

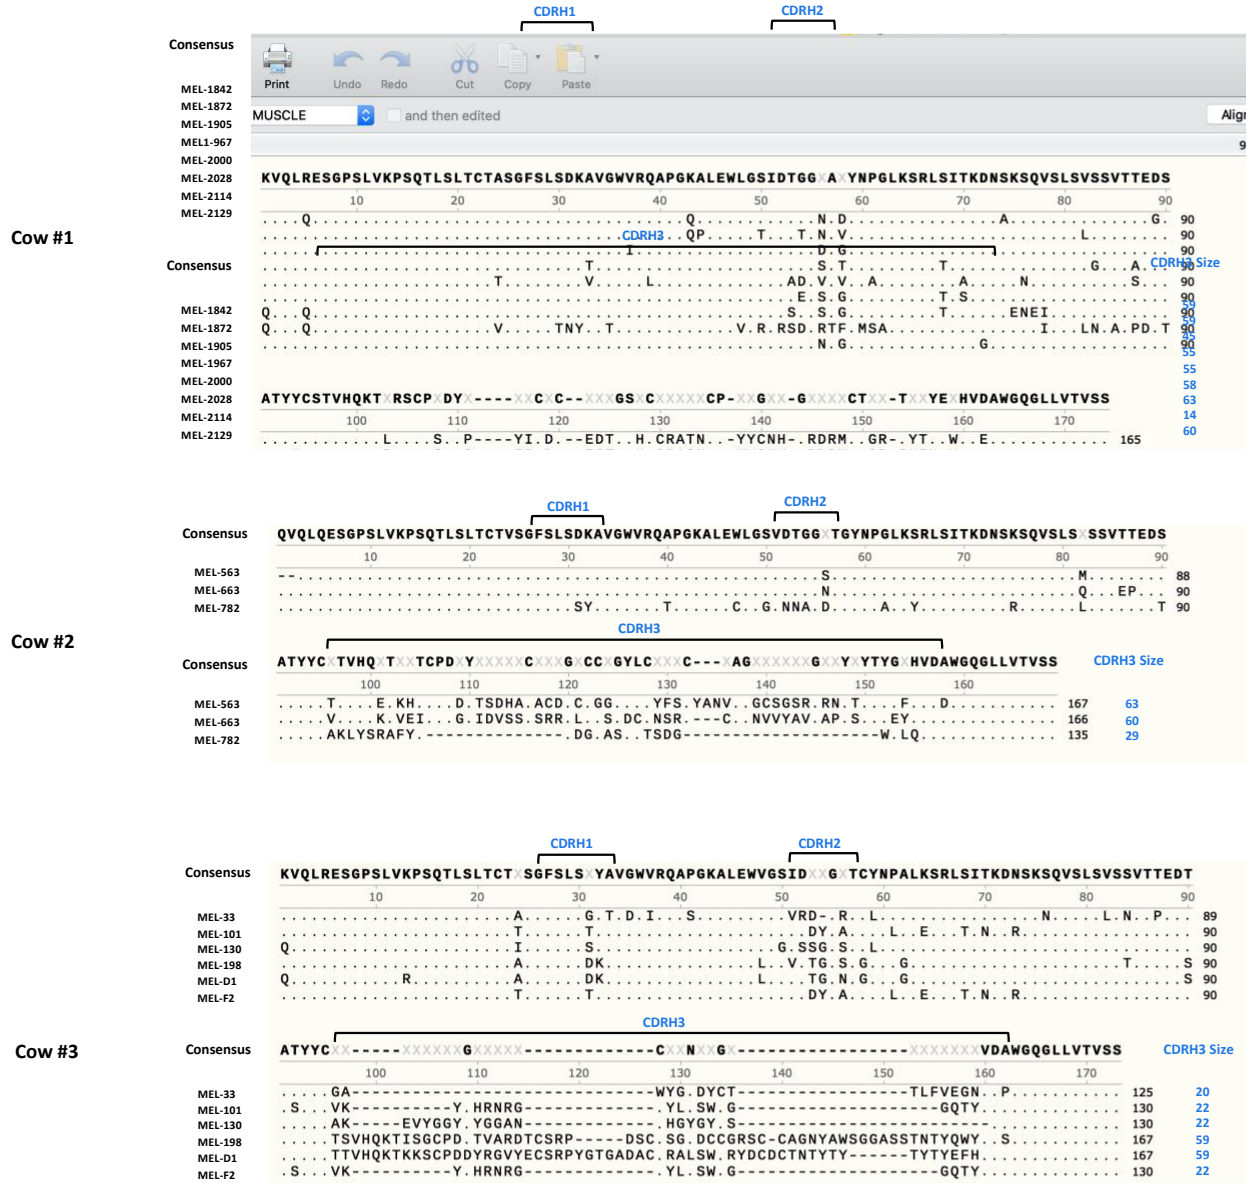

Figure S3. Amino acid alignment of heavy chain sequences of isolated monoclonal antibodies. Related to Figure 2.



**Geometric mean IC50**

| Clade | n  | VRC01   |        | NC-Cow1 |       | MEL-1842 |       | MEL-1872 |       | MEL-2129 |       |
|-------|----|---------|--------|---------|-------|----------|-------|----------|-------|----------|-------|
|       |    | Breadth | IC50   | Breadth | IC50  | Breadth  | IC50  | Breadth  | IC50  | Breadth  | IC50  |
| A     | 7  | NA      | NA     | 100%    | 0.040 | 100%     | 0.011 | 100%     | 0.005 | 86%      | 0.215 |
| B     | 12 | 100%    | 0.0117 | 50%     | 0.094 | 100%     | 0.004 | 100%     | 0.004 | 100% *   | 0.072 |
| C     | 19 | NA      | NA     | 42%     | 0.081 | 32%      | 0.018 | 37%      | 0.021 | 21%      | 0.087 |
| AE    | 5  | NA      | NA     | 100%    | 0.216 | 80%      | 0.154 | 60%      | 0.008 | 20%      | 0.001 |
| BC    | 2  | NA      | NA     | 50%     | 0.219 | 0%       | -     | 0%       | -     | 0%       | -     |
| AC    | 1  | NA      | NA     | 0%      | -     | 0%       | -     | 100%     | 2.830 | 0%       | -     |
| G     | 1  | 100%    | 0.073  | 100%    | 0.118 | 100%     | 0.069 | 100%     | 0.007 | 100%     | 0.257 |
| 47    |    |         |        |         |       |          |       |          |       |          |       |

IC50 (µg/ml)     <0.01 ■     0.01-1 ■     1-20 ■

\* 11 clade B tested.

**Geometric mean IC80**

| Clade | n  | VRC01   |       | NC-Cow1 |       | MEL-1842 |       | MEL-1872 |       | MEL-2129 |        |
|-------|----|---------|-------|---------|-------|----------|-------|----------|-------|----------|--------|
|       |    | Breadth | IC80  | Breadth | IC80  | Breadth  | IC80  | Breadth  | IC80  | Breadth  | IC80   |
| A     | 7  | NA      | NA    | 100%    | 0.185 | 100%     | 0.070 | 100%     | 0.028 | 71%      | 1.030  |
| B     | 12 | 92%     | 0.346 | 42%     | 1.029 | 100%     | 0.030 | 100%     | 0.031 | 64% *    | 0.047  |
| C     | 19 | NA      | NA    | 37%     | 0.181 | 26%      | 0.035 | 32%      | 0.053 | 21%      | 0.710  |
| AE    | 5  | NA      | NA    | 60%     | 0.164 | 40%      | 0.022 | 60%      | 0.032 | 20%      | 0.006  |
| BC    | 2  | NA      | NA    | 50%     | 0.934 | 0%       | -     | 0%       | -     | 0%       | -      |
| AC    | 1  | NA      | NA    | 0%      | -     | 0%       | -     | 0%       | -     | 0%       | -      |
| G     | 1  | 100%    | 1.146 | 100%    | 0.997 | 100%     | 2.005 | 100%     | 0.122 | 100%     | 10.015 |
| 47    |    |         |       |         |       |          |       |          |       |          |        |

IC80 (µg/ml)     <0.01 ■     0.01-1 ■     1-20 ■

\* 11 clade B tested.

**Figure S4. Categorization of neutralization activity of bovine bNAbs against clade A, B, C, AE, BC, AC and G HIV viruses.** Values in red color show low IC<sub>50</sub> and IC<sub>80</sub> and better neutralization while, those in yellow color show high IC<sub>50</sub> and IC<sub>80</sub> values and less neutralization activity. Neutralization assays were performed in duplicates with two independent biological replicates. Related to Figure 3.

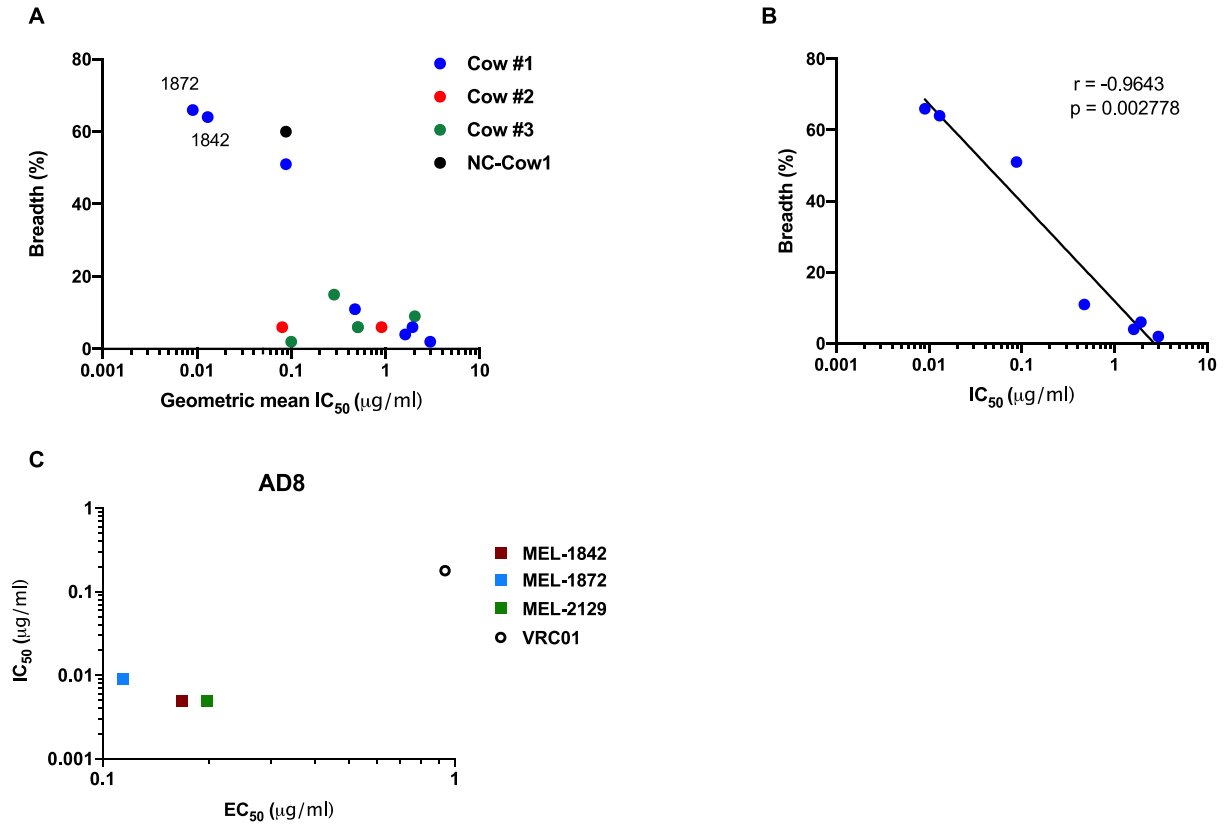

**Figure S5. Correlation of neutralization and Env binding in isolated monoclonal antibodies.** A) Correlations between the neutralizing breadth and neutralization activity ( $IC_{50}$ ) of AD8 SOSIP binding antibodies, B) Correlations between the neutralizing breadth and neutralization activity ( $IC_{50}$ ) of bNAbs from cow #1, C) Correlation between  $IC_{50}$  and  $EC_{50}$  of bNAbs of cow#1 against AD8 strain. Related to Figure 2 and 3.

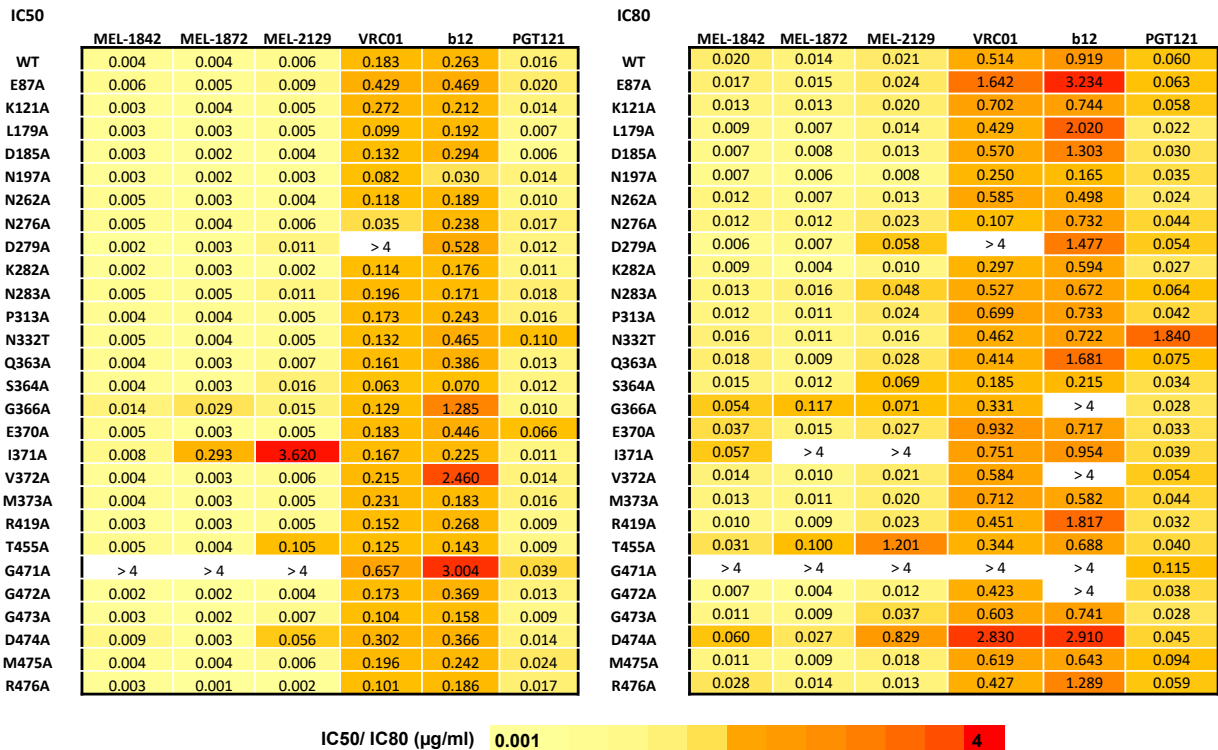

**Figure S6. Heatmap of relative neutralization activity of monoclonal antibodies against AD8 Env mutants.** The colors refer to the changes in IC<sub>50</sub> and IC<sub>80</sub> ranging from 0.001 ug/ml (yellow) to 4ug/ml (red). Values in yellow color show low IC<sub>50</sub> and better neutralization while, those in red color show high IC<sub>50</sub> values and less neutralization activity. White indicates values of >4, meaning that the IC<sub>50</sub> could not be achieved for the viruses with that particular mutation to Env. PGT121 (V3-glycan epitope) and b12 and VRC01 (CD4bs epitope) were included for comparison. Neutralization assays were performed in duplicates with two independent biological replicates. Average IC<sub>50</sub> values were used for drawing heatmaps. Related to Figure 5.
